# Supplementary material for: Laser-assisted photothermal heating of a plasmonic nanoparticle-suspended droplet in a microchannel
Source: Royal Society of Chemistry journal article supplement (doi:10.1039/c4an01750a), 2014-12-24
Supplement: c4an01750a1.pdf [file c4an01750a1.pdf]

## Supplementary Information

### Laser-Assisted Photothermal Heating of a Plasmonic Nanoparticle-Suspended Droplet in a Microchannel

*Timothy Walsh, Jungchul Lee, and Keunhan Park*

#### 1. Finite Element Analysis of Microdroplet Temperature in a Microchannel

Upon the calculation of the spectral absorptance distribution, the total volumetric photothermal absorption rate can be calculated by  $q'''(z) = \frac{d}{dz} \left[ \int_{\lambda_{\min}}^{\lambda_{\max}} \tau A_{\lambda}(z) P_{\lambda} d\lambda \right]$ , where  $\tau$  is the transmittance of the PDMS microchannel cover, and  $P_{\lambda}$  is the spectral laser power density. The laser power density was assumed to be wavelength-dependent with Gaussian distribution that has a full-width at half maximum of 3 nm. In order to calculate the temperature distribution of a microdroplet-in-microchannel system, the present study numerically solved the heat transfer equation using a commercial finite element analysis package (COMSOL Multiphysics). The FEA domain is illustrated in **Figure S1a**, where a nanoparticle-suspended droplet is placed in the center and mineral oil is filled in the remaining of the PDMS microchannel. The heat transfer equation can be written as

$$\rho c \frac{\partial T(\hat{\mathbf{r}}, t)}{\partial t} = \nabla \cdot (k \nabla T) + q'''(\hat{\mathbf{r}}) \quad \backslash * \text{MERGEFORMAT (2)}$$

Where  $\rho$  is the density,  $c$  is the specific heat, and  $k$  is the thermal conductivity. It should be noted that a microdroplet was assumed to be stationary and natural convection within the microdroplet was not considered, as the Rayleigh number was found to be  $\ll 1$ . Since the volume concentration of nanoparticles under consideration is very low (i.e., less than 1 %), thermophysical properties of the nanofluid droplet were assumed to be the same as those of pure water. **Figure S2** shows the computation results for GNS and GNR suspension cases, demonstrating the capability of photothermal heating in a microchannel due to the enhanced light absorption upon the localized surface plasmon excitation.

## **2. Video Clip for Bubble Formation in a Microdroplet**

The supplemental video 1 shows local bubble formation in a  $\sim 30$  nL GNR PNF droplet of  $\sim 20.0$  ppm GNR concentration as a result of laser heating at 10x magnification. The GNR/QD solution was not well dispersed, leading to coalescing of vapor and induced flow within the microchannel. The medium surrounding the droplet is mineral oil and the laser power density is  $\sim 200 \text{ W} \cdot \text{cm}^{-2}$ .

## **3. Video Clip for Convection in a Microdroplet**

Supplemental video 2 shows local convection within a  $\sim 30$  nL GNS PNF droplet of  $\sim 0.5$  ppm GNS concentration as a result of laser heating at 20x magnification. The surrounding GNS particles, as well as the small agglomerations, can be seen being drawn into a circulating column of fluid centered about the laser spot of  $\sim 550 \text{ W} \cdot \text{cm}^{-2}$  power density.

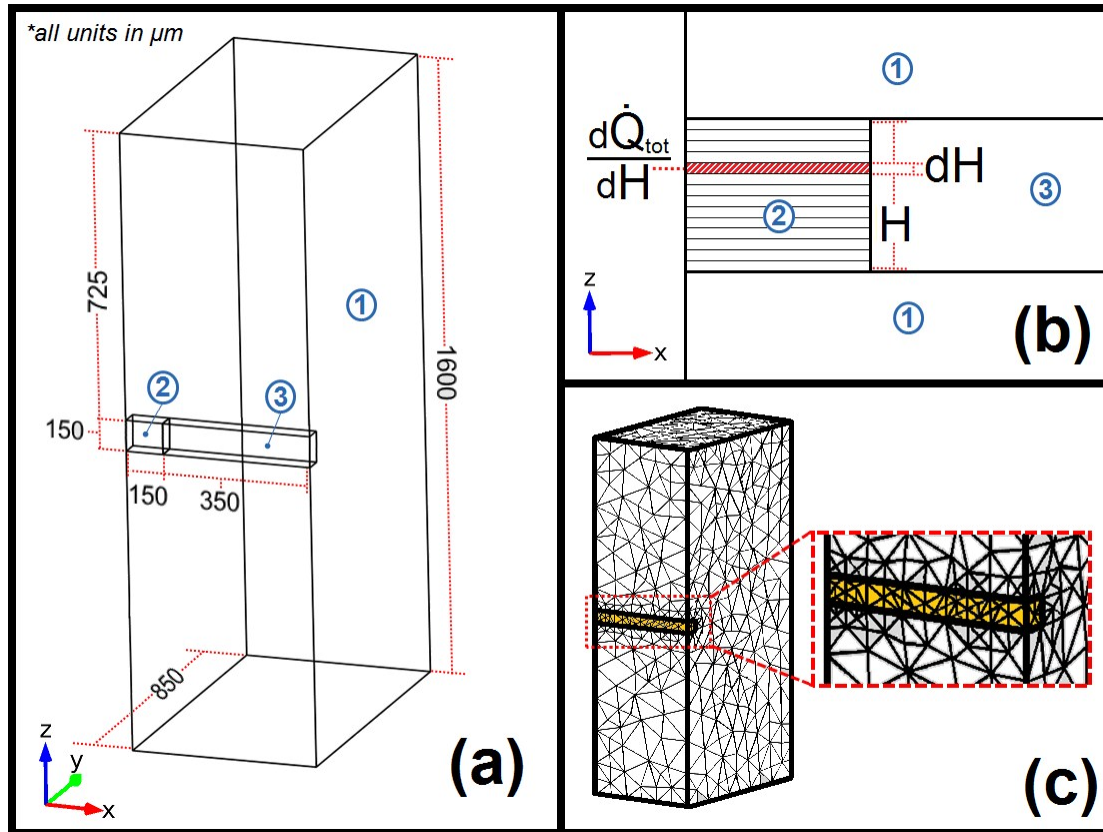

**Figure S1. (a)** Full FEA model in COMSOL with dimensions and subdomains: PDMS, water, and mineral oil USP labeled 1,2,3 respectively. **(b)** The discretization process of the volumetric heat generation in the microdroplet. **(c)** Fully meshed FEA model in COMSOL: 2807 tetrahedral elements and 106729 degrees of freedom.

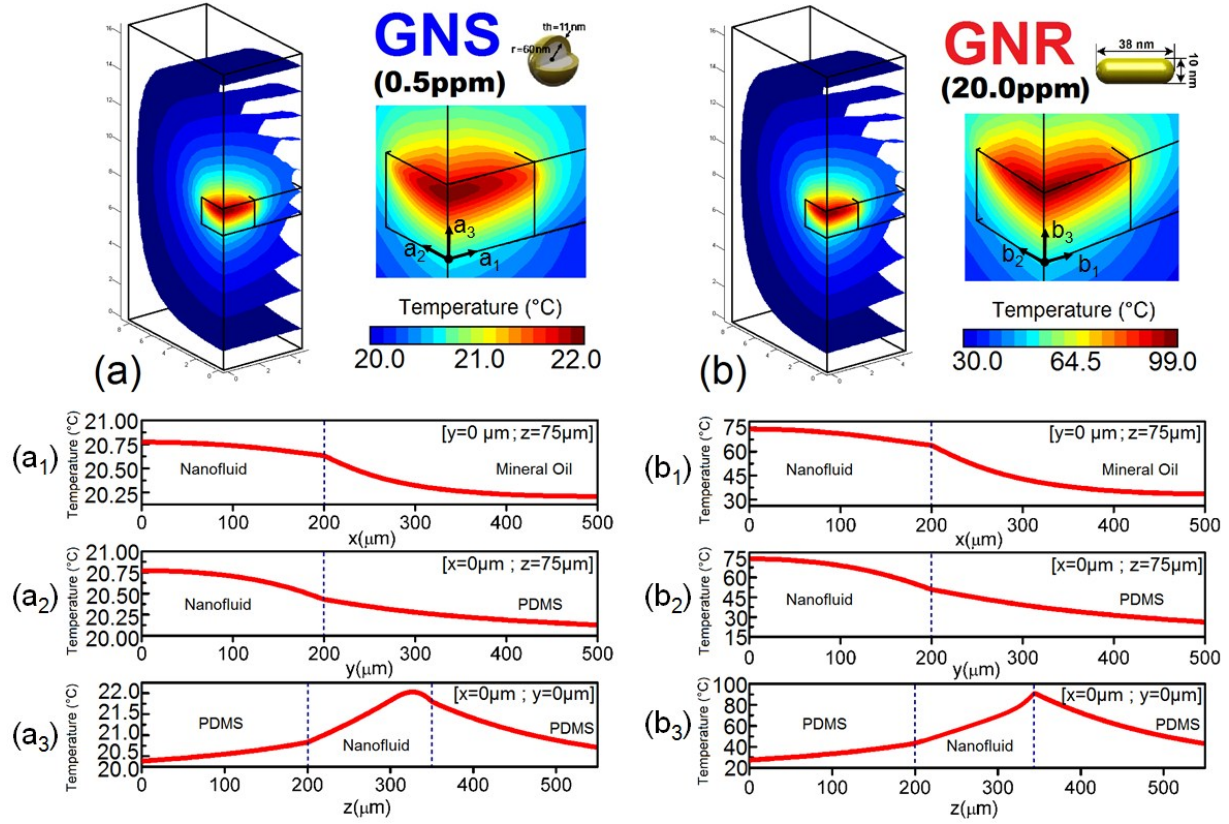

**Figure S2.** Simulated temperature steady-state distribution under  $500\text{W}\cdot\text{cm}^{-2}$  and  $450\text{W}\cdot\text{cm}^{-2}$  respectively for **(a)** 0.5ppm GNS concentration **(b)** 20.0ppm GNR concentration. **Top-to-bottom:** 3D isothermal plot, x-axis temperature profile ( $a_1, b_1$ ), y-axis temperature profile ( $a_2, b_2$ ), and z-axis temperature along microchannel center ( $a_3, b_3$ ).
